# Supplementary material for: Long Non-coding RNA DLEU2L Targets miR-210-3p to Suppress Gemcitabine Resistance in Pancreatic Cancer Cells via BRCA2 Regulation
Source: Front Mol Biosci. 2021 Apr 22;8:645365. doi: 10.3389/fmolb.2021.645365 (PMC8100451; doi:10.3389/fmolb.2021.645365)
Supplement: Supplementary file 1 [file Data_Sheet_1.docx]

**SUPPLEMENTARY MATERIALS**

**Long non-coding RNA DLEU2L targets miR-210-3p to suppress gemcitabine resistance in pancreatic cancer cells via BRCA2 regulation**

Fei Xu1, Heshui Wu2, Jiongxin Xiong2, Tao Peng2,*

1Department of Gastrointestinal Surgery, Union Hospital, Tongji Medical College, Huazhong University of Science and Technology, Wuhan, China

2Department of Pancreatic Surgery, Union Hospital, Tongji Medical College, Huazhong University of Science and Technology, Wuhan, China

* Corresponding author: Tao Peng

Email: pengtao8815@163.com

**Supplementary Figure Legends**

**
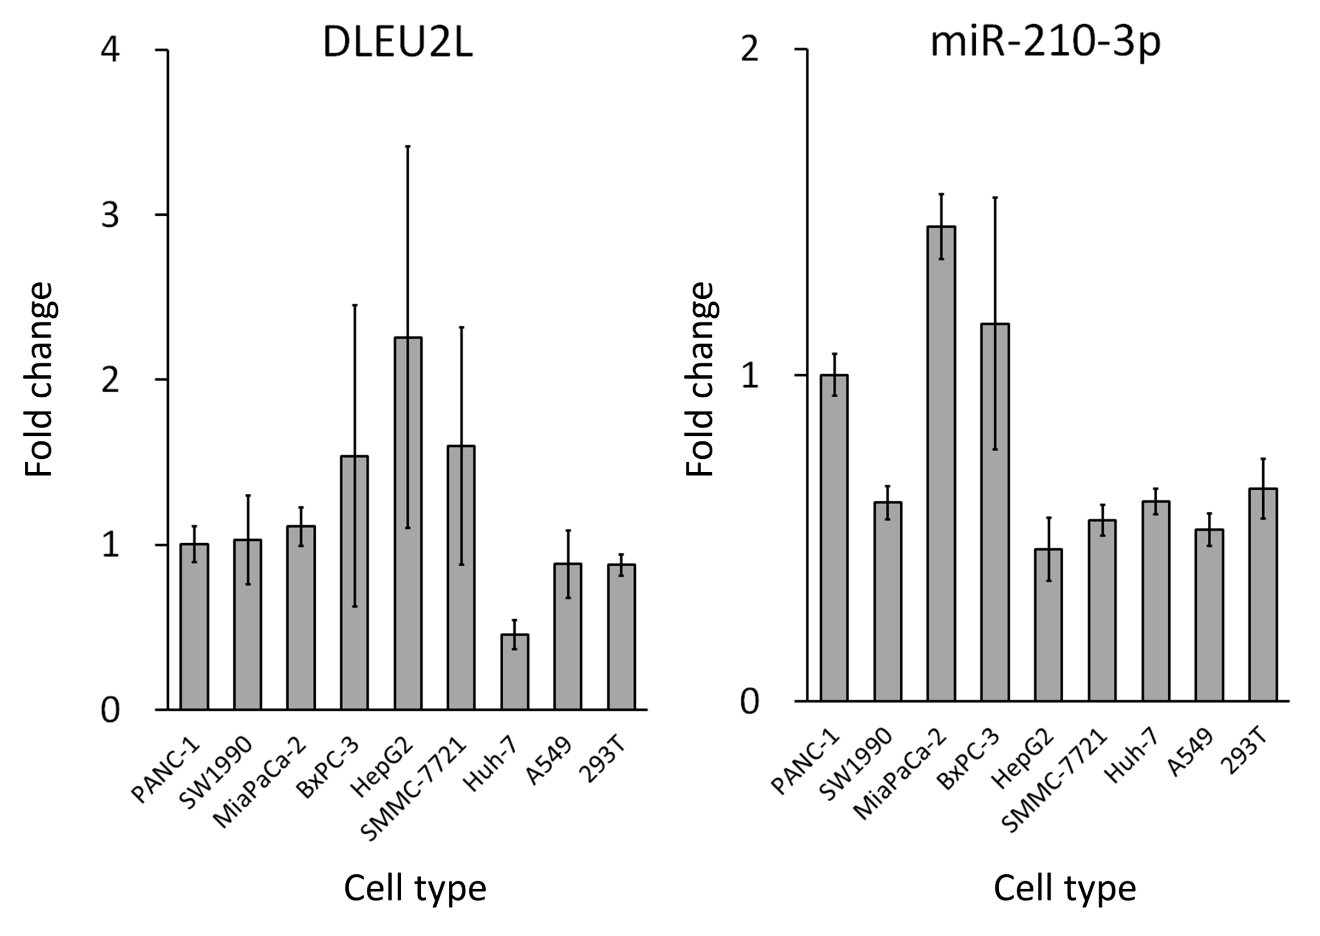
**

**Figure S1. qRT-PCR measurement of the expression of DLEU2L and miR-210-3p in different cell types.** All numerical data are expressed as the mean ± SD (n = 3).


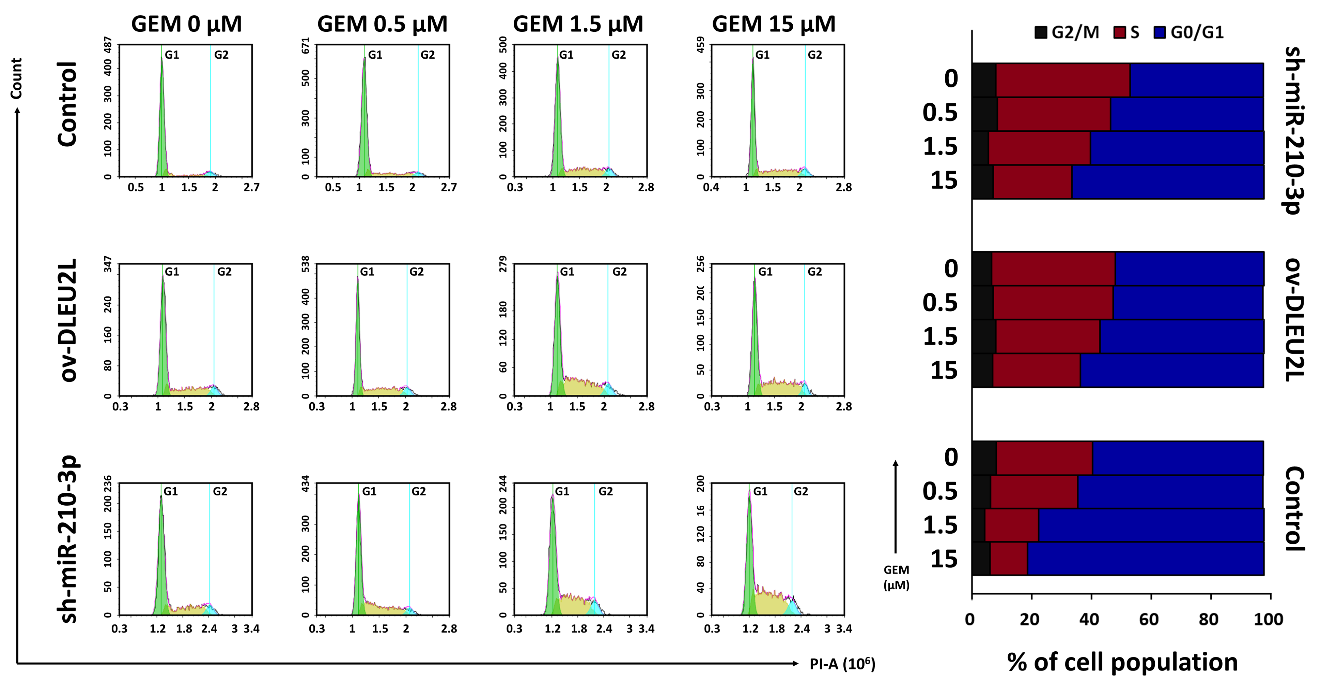


**Figure S2. Flow cytometry of cell cycle progression and quantification of the percentage of PANC-1 cells in the G2/M, S, and G0/G1 phase.** PANC-1 cells were non-transfected (Control) or transfected with DLEU2L overexpression (ov-DLEU2L) or miR-210-3p interference (sh-miR-210-3p) vectors and cultured in the presence of GEM at 0, 0.5, 1.5, or 15 μM for 0, 24, 48, or 72 h.
